# Supplementary material for: Podoplanin neutralization improves cardiac remodeling and function after myocardial infarction
Source: JCI journal article supplement (doi:10.1172/jci.insight.126967), 2019-07-09
Supplement: sd1 [file 1]

## **Online Supplement**

**Cimini M et al. 126967-INS-RG-TR-2**

## Figure S1

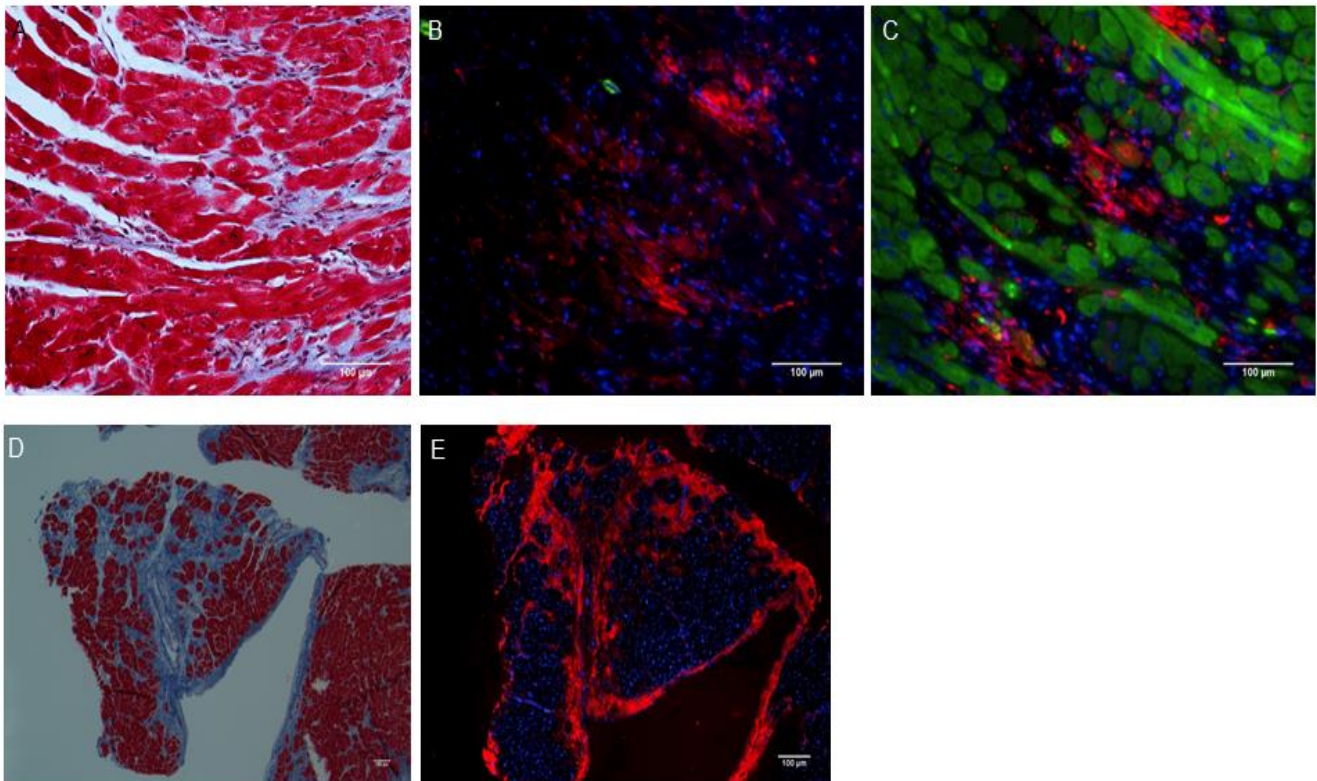

**Supplementary Figure S1: Podoplanin expression in murine and human fibrotic hearts:** Thin cardiac sections obtained from mice hearts (A-C) treated with Angiotensin II were stained with Masson's trichrome staining (A) and indirectly immunolabeled with antibodies that recognize podoplanin in red (B-C),  $\alpha$ Smooth muscle actin (B) and  $\alpha$ Sarcomeric actin in green (C), nuclei, blue. Fibrotic area from Angiotensin II treated animals express podoplanin. n=3/group. (D-E) Thin cardiac sections obtained from explanted ischemic human hearts were stained with the Masson's trichrome staining (D) and (E) indirectly immunolabeled with podoplanin antibody in red, nuclei, blue. Note that the infarcted/fibrotic tissue in blue (D) corresponds to the area in red (E) and is highly positive to podoplanin. n=5/ischemic cardiomyopathy hearts.

**Figure S2**

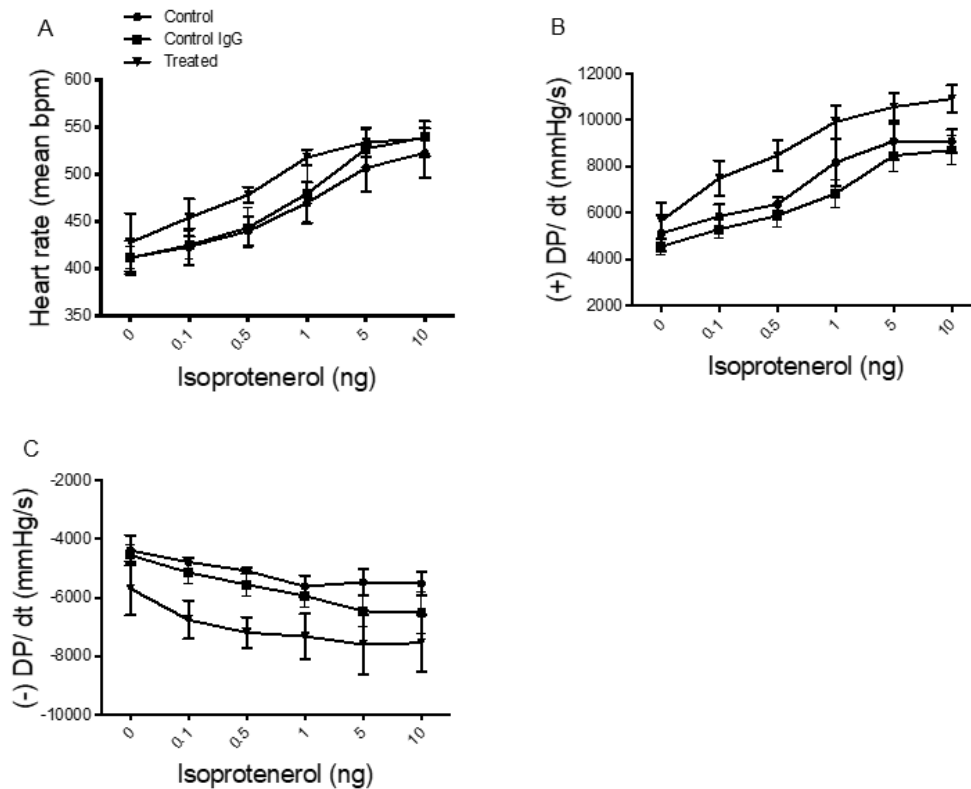

**Supplementary Figure S2: Podoplanin neutralization increases heart contractility.** (A) Heart rate, maximum (B) and minimum (C) Dp/dt, during the hemodynamic assessment showed an increase in contractility and relaxation in response to isoproterenol (0.1, 0.5, 1, 5, 10 ng/ml) in infarcted mice heart treated with podoplanin neutralizing antibody compared to the saline and IgG controls, at 30 days after myocardial infarction (MI). The statistical analysis showed a trend ( $p=0.057$ ) in max and min Dp/dt after maximum dose of isoproterenol.  $n=5-7$ /group. Data are presented as mean $\pm$ SEM. Two-way ANOVA analysis and Bonferroni post hoc test were performed among all groups.

**Figure S3**

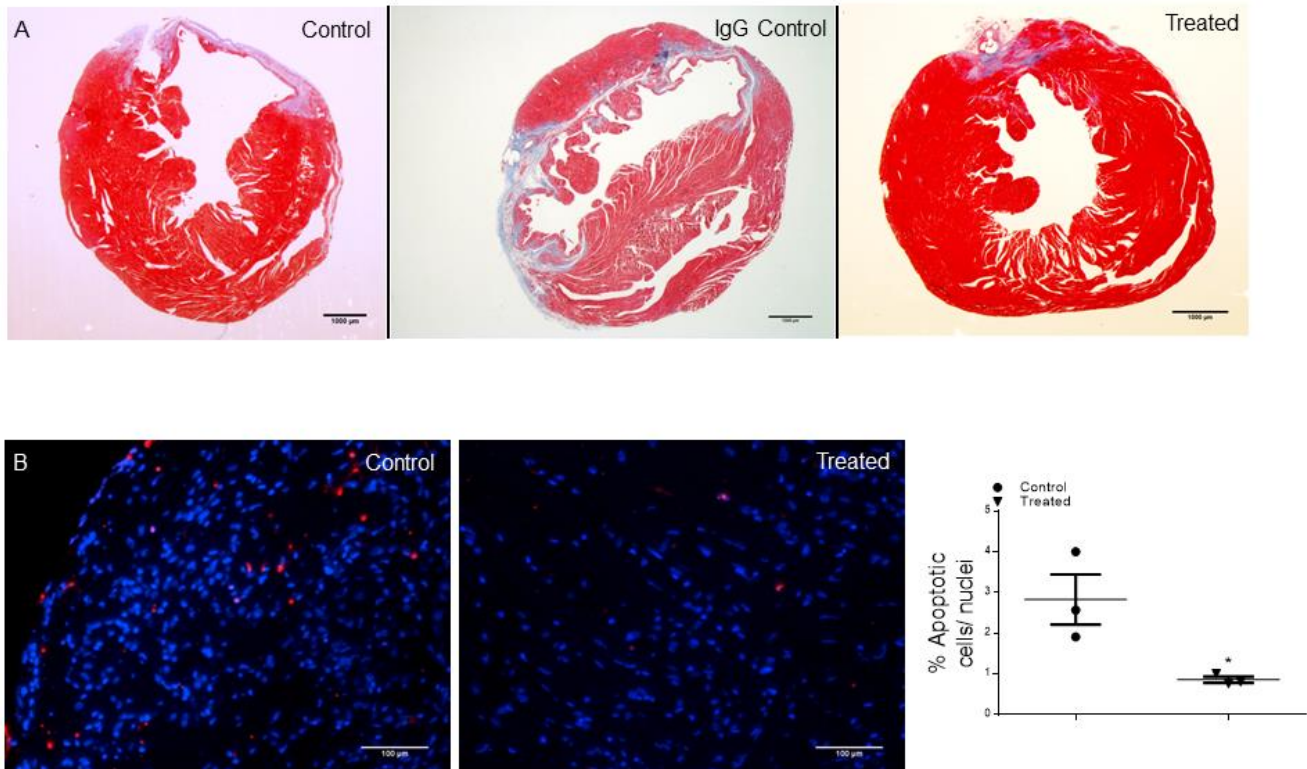

**Supplementary Figure S3: Podoplanin neutralization reduced the cell death.** (A) Thin cardiac sections of saline treated (left panel), IgG control treated (middle panel) and podoplanin neutralizing antibody treated (right panel) mice 30 days post-MI were subjected to Masson's trichrome staining. (B, Left panel) Thin cardiac sections from control (saline treated) and podoplanin neutralizing antibody treated (B, right panel) infarcted mice hearts at 3 days after MI were directly stained for the Terminal deoxynucleotidyl transferase-mediated dUTP nick end-labelling (TUNEL) in red. Nuclei, blue. Treated animals showed a reduced cell apoptosis compare to the control animals at the same time point after MI. (B, graph) Quantitative analysis of the apoptotic cells (stained for TUNEL assay) showed a reduced cell death when the animals are treated with podoplanin neutralizing antibody compared to the saline. n=3/group. Data are presented as mean±SEM \*P<0.05 saline control vs treated, scholastic t-test analysis and Bonferroni post hoc test was performed among all groups.

## Figure S4

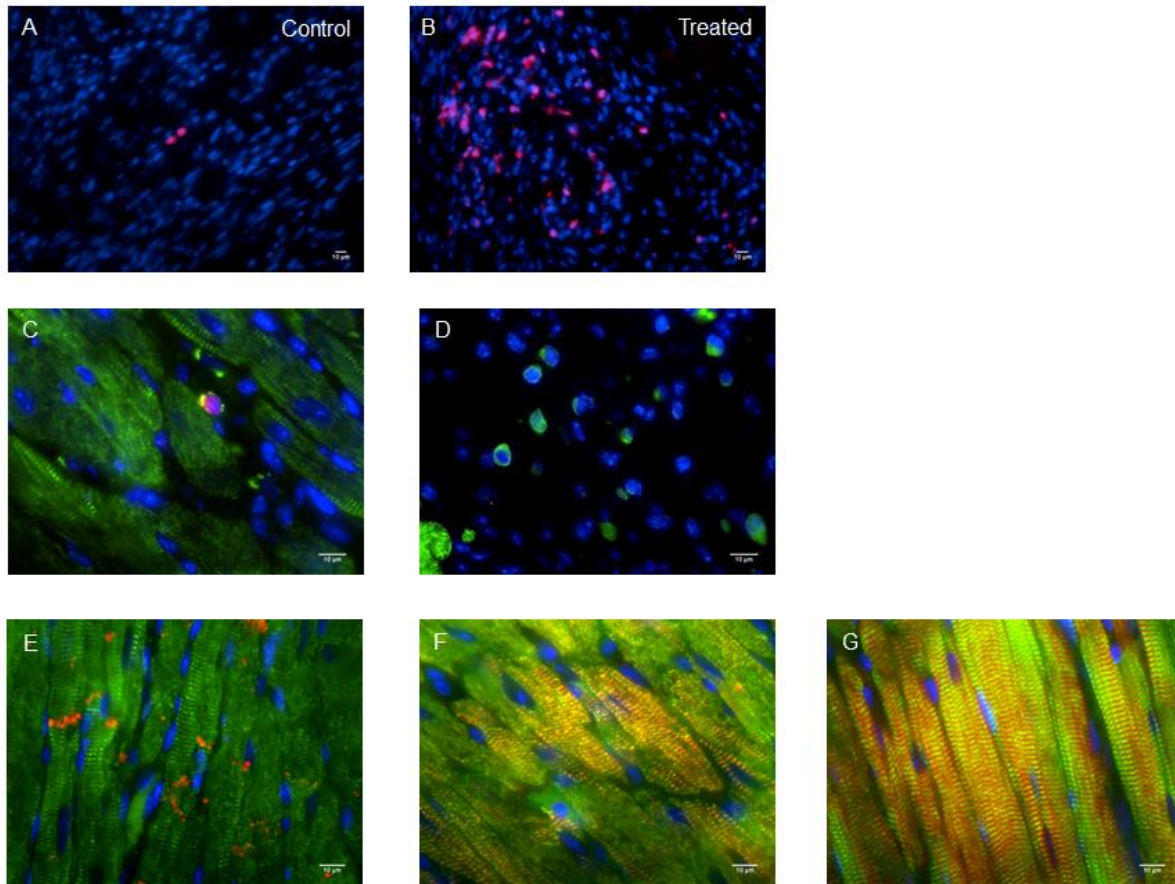

**Supplementary Figure S4: Podoplanin neutralization enhances endogenous activation of progenitor cells after myocardial infarction (MI).** (A) Thin cardiac sections of saline control and (B) podoplanin neutralizing antibody treated mice hearts at 7 days after MI were indirectly immunolabeled with NKX 2.5 in red, nuclei, blue. The panels A and B represent the low magnification of the corresponding main figures in Fig.5, A. (C) Thin cardiac sections of podoplanin neutralizing antibody treated infarcted mice hearts at 7 days after MI were indirectly immunolabeled with NKX 2.5 in red and troponin T in green, nuclei, blue. The NKX 2.5 positive cells were found disperse in the border zone (BZ) of the MI. (D) Thin cardiac sections of treated infarcted mice hearts at 7 days after MI were indirectly immunolabeled with  $\alpha$ Sarcomeric actin in green, nuclei, blue. Small cells positive for  $\alpha$ Sarcomeric actin were found disperse in the BZ and the ischemic area of MI. (E-G) Thin cardiac sections of podoplanin neutralizing antibody treated mice hearts at 30 days after MI were indirectly immunolabeled with connexin 43 (E) in red, troponin T (F) in red, troponin I (G) in red, and  $\alpha$ Sarcomeric actin in green, nuclei, blue. (E-G) The photomicrographs represent the remote area (RA) of the samples, used as internal control for the staining. n=5/group.



**Figure S5**

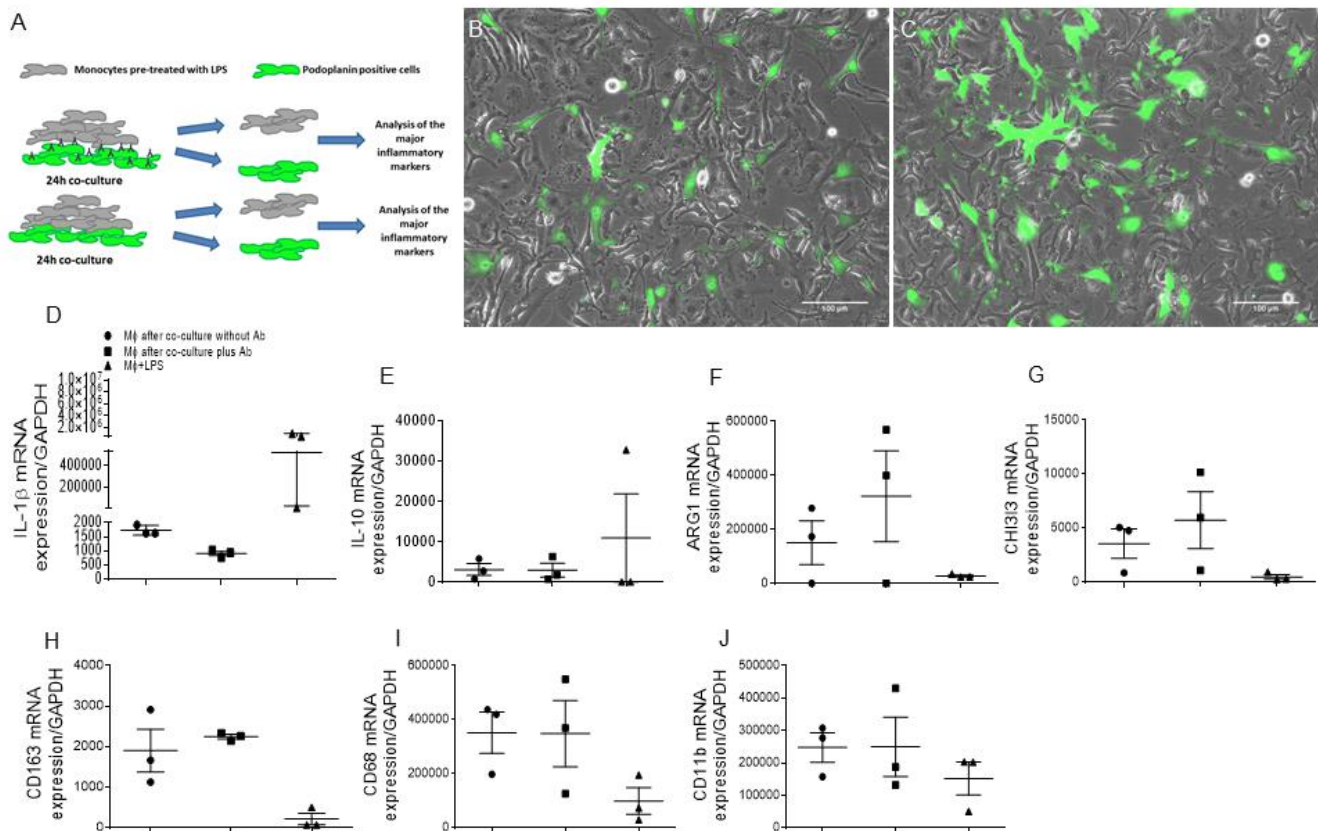

**Supplementary Figure S5: Activated monocytes co-cultured with podoplanin positive cells display anti-inflammatory characteristics.** (A) Schematic representation of experimental design. Podoplanin positive cells (in green) isolated from global GFP mouse hearts two days after myocardial infarction (MI) were treated or not with podoplanin neutralizing antibody (dark grey) and co-cultured for 24 hours with LPS activated monocytes (in grey). The neutralizing antibody inhibited the binding of podoplanin (ligand) with its receptor CLEC-2 expressed on activated monocyte/macrophages. After 24 hours of co-culture the cells were detached and the two populations were separated via GFP sorting. q-PCR analysis for pro and anti-inflammatory cytokines and markers was performed. (B-C) Representative image of GFP/podoplanin positive cells co-cultured with activated monocytes without (B) and with (C) the presence of podoplanin neutralizing antibody. q-PCR analysis of monocytes co-cultured with podoplanin positive cells in the presence of podoplanin neutralizing antibody show reduced level of (D) IL-1 $\beta$  and (J) CD11b mRNA. mRNA levels of anti-inflammatory monocyte lineage markers (F) ARG-1, (G) CHI3I3, (H) and CD163 were increased. The mRNA expression of IL-10 (E) and CD68 (I) did not change. Data are presented as mean $\pm$ SEM of three independent experiments  $p < 0.05$ , one-way ANOVA analysis.

**Figure S6**

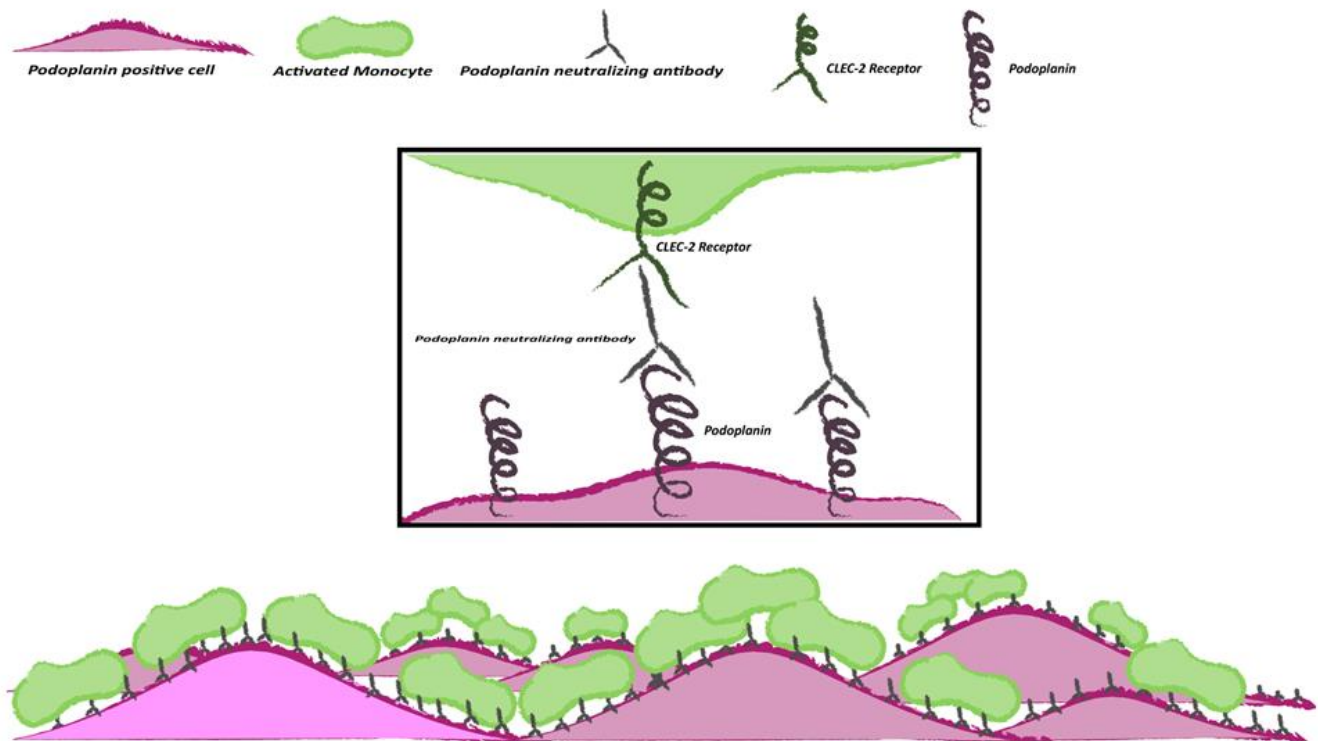

**Supplementary Figure S6: Representative cartoon of co-culture of podoplanin cells and activated monocytes/macrophages.** Cultured podoplanin positive cells (in pink) were treated with neutralizing antibody (grey). The neutralizing antibody inhibited the binding of podoplanin with its receptor CLEC-2 (dark green) expressed on activated monocyte/macrophages (green).

## Supplementary Tables

**Table S1: List of antibodies, reagents and sources**

| <b>Primary Antibodies</b> |                            |                                |                            |                            |
|---------------------------|----------------------------|--------------------------------|----------------------------|----------------------------|
| <b><i>Antigen</i></b>     | <b><i>Manufacturer</i></b> | <b><i>Catalogue number</i></b> | <b><i>Host species</i></b> | <b><i>Applications</i></b> |
| Anti-Biotin MicroBeads    | Miltenyi                   | 130-090-485                    |                            |                            |
| CD163                     | Abcam                      | Ab182422                       | rabbit                     | IHC, FC                    |
| CD206                     | eBioscience                | 12-4321-81                     | rat                        | FC                         |
| CD68                      | Abcam                      | Ab31630                        | mouse                      | IHC, FC                    |
| CD86                      | Abcam                      | Ab213044                       | mouse                      | FC                         |
| Clec-2                    | RnD Systems                | AF1718                         | goat                       | WB                         |
| Connexina 43              | Abcam                      | ab11370                        | rabbit                     | IHC                        |
| Fibronectin               | Abcam                      | ab2413                         | rabbit                     | IHC                        |
| Green Fluorescent Protein | Invitrogen                 | A10259                         | chicken                    | FC                         |
| Lineage Cocktail          | Miltenyi                   | 130-092-613                    | mouse                      | FC                         |
| LYVE-1                    | Abcam                      | ab14917                        | rabbit                     | IHC, FC                    |
| NKX 2.5                   | Bioss                      | Bs-2054R                       | rabbit                     | FC                         |
| PECAM-1                   | RnD Systems                | AF3628                         | goat                       | IHC                        |
| Podoplanin                | Santa Cruz                 | Sc-134483                      | rabbit                     | IHC, FC                    |
| Podoplanin                | RnD Systems                | AF3244                         | goat                       | IHC, FC                    |
| Podoplanin (biotinylated) | RnD Systems                | BAF3244                        | goat                       | IHC, FC                    |
| Podoplanin (human)        | RnD System                 | AF3670                         | sheep                      | IHC                        |
| Troponin I                | Santa Cruz                 | Sc-15368                       | mouse                      | IHC                        |
| Troponin T                | Thermo Scientific          | MA-12960                       | mouse                      | IHC                        |



|                             |                           |                         |                     |                     |
|-----------------------------|---------------------------|-------------------------|---------------------|---------------------|
| αSmooth Muscle Actin        | Sigma-Aldrich             | A2547                   | mouse               | IHC                 |
| αSarcomeric Actin           | Sigma-Aldrich             | A2172                   | mouse               | IHC                 |
| <b>Non-immune IgGs</b>      |                           |                         |                     |                     |
| <b>Description</b>          | <b>Manufacturer</b>       | <b>Catalogue number</b> | <b>Host species</b> | <b>Applications</b> |
| APC-IgG2a control           | BD Pharmingen             | 553991                  | rat                 | FC                  |
| PE-IgG2a control            | eBioscience               | 12-4321-81              | rat                 | FC                  |
| <b>Secondary Antibodies</b> |                           |                         |                     |                     |
| <b>Reactivity</b>           | <b>Manufacturer</b>       | <b>Catalogue number</b> | <b>Conjugate</b>    | <b>Applications</b> |
| Rabbit                      | Life Technologies         | A21206                  | Alexa Fluor 488     | IHC, FC             |
| Rabbit                      | Life Technologies         | A31572                  | Alexa Fluor 555     | IHC, FC             |
| Mouse                       | Life Technologies         | A21202                  | Alexa Fluor 488     | IHC, FC             |
| Goat                        | Life Technologies         | A21432                  | Alexa Fluor 555     | IHC, FC             |
| Sheep                       | Life Technologies         | A21436                  | Alexa Fluor 555     | IHC                 |
| Mouse                       | Jackson<br>ImmunoResearch | 715-545-140             | Alexa Fluor 488     | IHC, FC             |

**Table S2: List of primers used in the study**

| <b>Primer (Mouse Gene) Name</b> | <b>Forward 5'-3'</b>              | <b>Reverse 5'-3'</b>           |
|---------------------------------|-----------------------------------|--------------------------------|
| ARG-1                           | AAGCCAGGGACTGACTACCTTAAA          | TGATGCCCCAGATGGTTTTTC          |
| bFGF                            | GTCACGGAAATACTCCAGTTGGT           | CCGTTTTGGATCCGAGTTTATACT       |
| CD11b                           | CGCACCCAGGTCTTTGGA                | CCACGCAGTCCGGTAAAATT           |
| CD163                           | CAGGACAGCCAGCTAAATGGA             | ATGAAGATGCAGCTGTGGTCAT         |
| CD68                            | TGGCGGTGGAATACAATGTG              | GAGATGAATTCTGCGCCATGA          |
| CH3I3I3                         | TTCTGAATGAAGGAGCCACTGA            | ATTGTCATAACCAACCCACTCATTAC     |
| EGF                             | GCTACGAAGGAGACGGGATCT             | TGCAGGCGGCATTCTCA              |
| IL-10                           | CAGCCGGGAAGACAATAACTG             | CCGCAGCTCTAGGAGCATGT           |
| IL-1b                           | CTACAGGCTCCGAGATGAACAAC           | TCCATTGAGGTGGAGAGCTTTC         |
| Ly6C                            | TGCTATGGAGTGCCAATTGAGA            | GAGCAATGCAGAATCCATCAGA         |
| PDGFa                           | CTCGAAGTCAGATCCACAGCAT            | CTCAGCCCCTACGGAGTCTATC         |
| PDGFb                           | ACCTCGCCTGCAAGTGTGA               | TGCTCCCTGGATGTCCCA             |
| TNFa                            | GGCTGCCCCGACTACGT                 | AGGTTGACTTTCTCCTGGTATGAGA      |
| VEGF-A                          | AGGCTGCTGTAACGATGAAG              | TCTCCTATGTGCTGGCTTTG           |
| VEGF-C                          | CAG CAA GAC GTT GTT TGA AAT TAC A | GTG ATT GGC AAA ACT GAT TGT GA |
| VEGF-D                          | GCAAATCGCGCACTCTGA                | TGGCAAGACTTTTGAGCTTCAA         |
